# Supplementary material for: High Rates of Sexualized Drug Use or Chemsex among Brazilian Transgender Women and Young Sexual and Gender Minorities
Source: MDPI journal article supplement (doi:10.3390/ijerph19031704), 2022-02-02
Supplement: s1 [file s1]

**Suppl Table S1.** PrEP and PEP information according to gender.

|                                                       | Total<br>N=3924 | Gender                  |                            |                    | p-value          |
|-------------------------------------------------------|-----------------|-------------------------|----------------------------|--------------------|------------------|
|                                                       |                 | Cisgender men<br>n=3553 | Transgender women<br>n=280 | Non binary<br>n=91 |                  |
| <b>PrEP awareness</b>                                 |                 |                         |                            |                    | <b>&lt;0.001</b> |
| No                                                    | 185 (4.7)       | 146 (4.1)               | 30 (10.7)                  | 9 (9.9)            |                  |
| Yes                                                   | 3739 (95.3)     | 3407 (95.9)             | 250 (89.3)                 | 82 (90.1)          |                  |
| <b>PrEP eligibility</b>                               |                 |                         |                            |                    | <b>0.006</b>     |
| No                                                    | 706 (18.0)      | 630 (17.7)              | 48 (17.1)                  | 28 (30.8)          |                  |
| Yes                                                   | 3218 (82.0)     | 2923 (82.3)             | 232 (82.9)                 | 63 (69.2)          |                  |
| <b>PrEP use</b>                                       |                 |                         |                            |                    | <b>0.011</b>     |
| Never                                                 | 2528 (64.4)     | 2303 (64.8)             | 165 (58.9)                 | 60 (65.9)          |                  |
| Current                                               | 1139 (29)       | 1032 (29)               | 83 (29.6)                  | 24 (26.4)          |                  |
| Past                                                  | 257 (6.5)       | 218 (6.1)               | 32 (11.4)                  | 7 (7.7)            |                  |
| <b>Willingness to use PrEP (N=2528)</b>               |                 |                         |                            |                    | <b>&lt;0.001</b> |
| No                                                    | 957 (37.9)      | 818 (35.5)              | 106 (64.2)                 | 33 (55.0)          |                  |
| Yes                                                   | 1571 (62.1)     | 1485 (64.5)             | 59 (35.8)                  | 27 (45.0)          |                  |
| <b>PrEP modality</b>                                  |                 |                         |                            |                    | <b>0.006</b>     |
| Daily oral PrEP                                       | 1048 (92.5)     | 956 (93)                | 73 (89)                    | 19 (82.6)          |                  |
| ED-PrEP                                               | 33 (2.9)        | 31 (3)                  | 0 (0)                      | 2 (8.7)            |                  |
| Injectable PrEP                                       | 52 (4.6)        | 41 (4)                  | 9 (11)                     | 2 (8.7)            |                  |
| <b>Complete adherence (past 30 days)<br/>(N=1047)</b> |                 |                         |                            |                    | <b>0.427</b>     |
| No                                                    | 358 (34.2)      | 322 (33.7)              | 30 (41.1)                  | 6 (31.6)           |                  |
| Yes                                                   | 689 (65.8)      | 633 (66.3)              | 43 (58.9)                  | 13 (68.4)          |                  |
| <b>Complete adherence (past 7 days)<br/>(N=1048)</b>  |                 |                         |                            |                    | <b>0.004</b>     |
| No                                                    | 128 (12.2)      | 111 (11.6)              | 10 (13.7)                  | 7 (36.8)           |                  |
| Yes                                                   | 920 (87.8)      | 845 (88.4)              | 63 (86.3)                  | 12 (63.2)          |                  |
| <b>PEP use (past 12 months)</b>                       |                 |                         |                            |                    | <b>0.857</b>     |
| No                                                    | 3237 (82.5)     | 2930 (82.5)             | 230 (82.1)                 | 77 (84.6)          |                  |
| Yes                                                   | 687 (17.5)      | 623 (17.5)              | 50 (17.9)                  | 14 (15.4)          |                  |

All results are shown in number of respondents in that category followed by percentage in parentheses
